# Supplementary material
Source: publisher figshare collection journal article supplement (https://acs.figshare.com/ndownloader/files/4766512)
Supplement: Supplementary file 1 [file 4766512]

_journal_name_full               'Crystal Growth & Design'

_journal_coden_Cambridge        ?

_publ_contact_author_name        'Can-Zhong Lu'

_publ_contact_author_address     
# Name and address of author for correspondence
;
Lu, Can-Zhong
The State Key Laboratory of Structure Chemistry, 
Fujian Institute of Research on the Structure of Matter, 
the Chinese Academy of Sciences,
Fuzhou, Fujian, 350002
P. R. China
;
_publ_contact_author_phone       '86-591-83705794'
_publ_contact_author_fax         '86-591-83714946'
_publ_contact_author_email       czlu@ms.fjirsm.ac.cn

_publ_section_title              
;
Construction of Novel Cd/Zn(II)-1,2,4-Triazolate Coordination 
Complexes via Controlling Substituents and Anions 
;

loop_
_publ_author_name
_publ_author_address
'Quan-Guo Zhai'
'Xiao-Yuan Wu'
'Shu-Mei Chen'
'Wen-Bin Yang'
'Can-Zhong Lu'
; The State Key Laboratory of Structure Chemistry, 
Fujian Institute of Research on the Structure of Matter, 
the Chinese Academy of Sciences,
Fuzhou, Fujian, 350002
P. R. China
;

#=================================END   
data_1 
  
_audit_creation_method            SHELXL-97 
_chemical_name_systematic 
; 
 ? 
; 
_chemical_name_common             ? 
_chemical_melting_point           ? 
_chemical_formula_moiety          'C24 H18 Cd2 Cl4 N10' 
_chemical_formula_sum             'C24 H18 Cd2 Cl4 N10'
_chemical_formula_weight          813.08 
  
loop_ 
 _atom_type_symbol 
 _atom_type_description 
 _atom_type_scat_dispersion_real 
 _atom_type_scat_dispersion_imag 
 _atom_type_scat_source 
 'C'  'C'   0.0033   0.0016 
 'International Tables Vol C Tables 4.2.6.8 and 6.1.1.4' 
 'H'  'H'   0.0000   0.0000 
 'International Tables Vol C Tables 4.2.6.8 and 6.1.1.4' 
 'N'  'N'   0.0061   0.0033 
 'International Tables Vol C Tables 4.2.6.8 and 6.1.1.4' 
 'Cl'  'Cl'   0.1484   0.1585 
 'International Tables Vol C Tables 4.2.6.8 and 6.1.1.4' 
 'Cd'  'Cd'  -0.8075   1.2024 
 'International Tables Vol C Tables 4.2.6.8 and 6.1.1.4' 
  
_symmetry_cell_setting            Triclinic 
_symmetry_space_group_name_H-M    P-1
_symmetry_space_group_name_Hall   -P1 
  
loop_ 
 _symmetry_equiv_pos_as_xyz 
 'x, y, z' 
 '-x, -y, -z' 
  
_cell_length_a                    8.172 
_cell_length_b                    8.80680(10) 
_cell_length_c                    11.06690(10) 
_cell_angle_alpha                 67.496(9) 
_cell_angle_beta                  75.765(10) 
_cell_angle_gamma                 70.771(9) 
_cell_volume                      688.212(55) 
_cell_formula_units_Z             1 
_cell_measurement_temperature     293(2) 
_cell_measurement_reflns_used     1948
_cell_measurement_theta_min       3.0539
_cell_measurement_theta_max       27.4835
  
_exptl_crystal_description        'Prism' 
_exptl_crystal_colour             'White' 
_exptl_crystal_size_max           0.30 
_exptl_crystal_size_mid           0.15 
_exptl_crystal_size_min           0.10 
_exptl_crystal_density_meas       ? 
_exptl_crystal_density_diffrn     1.962 
_exptl_crystal_density_method     'not measured' 
_exptl_crystal_F_000              396 
_exptl_absorpt_coefficient_mu     1.970 
_exptl_absorpt_correction_type    none 
_exptl_absorpt_correction_T_min   0.5895 
_exptl_absorpt_correction_T_max   0.8274 
_exptl_absorpt_process_details    SADABS 
  
_exptl_special_details 
; 
 ? 
; 
  
_diffrn_ambient_temperature       293(2) 
_diffrn_radiation_wavelength      0.71073 
_diffrn_radiation_type            MoK\a 
_diffrn_radiation_source          'fine-focus sealed tube' 
_diffrn_radiation_monochromator   graphite 
_diffrn_measurement_device_type   'SMART CCD'
_diffrn_measurement_method        '\w scans' 
_diffrn_detector_area_resol_mean  14.6306 
_diffrn_standards_number          ? 
_diffrn_standards_interval_count  ? 
_diffrn_standards_interval_time   ? 
_diffrn_standards_decay_%         ? 
_diffrn_reflns_number             5315 
_diffrn_reflns_av_R_equivalents   0.0134 
_diffrn_reflns_av_sigmaI/netI     0.0230 
_diffrn_reflns_limit_h_min        -10 
_diffrn_reflns_limit_h_max        10 
_diffrn_reflns_limit_k_min        -11 
_diffrn_reflns_limit_k_max        10 
_diffrn_reflns_limit_l_min        -14 
_diffrn_reflns_limit_l_max        12 
_diffrn_reflns_theta_min          3.06 
_diffrn_reflns_theta_max          27.48 
_reflns_number_total              3116 
_reflns_number_gt                 2945 
_reflns_threshold_expression      >2sigma(I) 
  
_computing_data_collection        SMART
_computing_cell_refinement        SAINT
_computing_data_reduction         SAINT
_computing_structure_solution     'SHELXS-97 (Sheldrick, 1990)' 
_computing_structure_refinement   'SHELXL-97 (Sheldrick, 1997)' 
_computing_molecular_graphics     ? 
_computing_publication_material   ? 
  
_refine_special_details 
; 
 Refinement of F^2^ against ALL reflections.  The weighted R-factor wR and 
 goodness of fit S are based on F^2^, conventional R-factors R are based 
 on F, with F set to zero for negative F^2^. The threshold expression of 
 F^2^ > 2sigma(F^2^) is used only for calculating R-factors(gt) etc. and is 
 not relevant to the choice of reflections for refinement.  R-factors based 
 on F^2^ are statistically about twice as large as those based on F, and R- 
 factors based on ALL data will be even larger. 
; 
  
_refine_ls_structure_factor_coef  Fsqd 
_refine_ls_matrix_type            full 
_refine_ls_weighting_scheme       calc 
_refine_ls_weighting_details 
 'calc w=1/[\s^2^(Fo^2^)+(0.0445P)^2^+0.7911P] where P=(Fo^2^+2Fc^2^)/3' 
_atom_sites_solution_primary      direct 
_atom_sites_solution_secondary    difmap 
_atom_sites_solution_hydrogens    geom 
_refine_ls_hydrogen_treatment     constr 
_refine_ls_extinction_method      none 
_refine_ls_extinction_coef        ? 
_refine_ls_number_reflns          3116 
_refine_ls_number_parameters      181 
_refine_ls_number_restraints      0 
_refine_ls_R_factor_all           0.0323 
_refine_ls_R_factor_gt            0.0301 
_refine_ls_wR_factor_ref          0.0812 
_refine_ls_wR_factor_gt           0.0791 
_refine_ls_goodness_of_fit_ref    1.060 
_refine_ls_restrained_S_all       1.060 
_refine_ls_shift/su_max           0.000 
_refine_ls_shift/su_mean          0.000 
  
loop_ 
 _atom_site_label 
 _atom_site_type_symbol 
 _atom_site_fract_x 
 _atom_site_fract_y 
 _atom_site_fract_z 
 _atom_site_U_iso_or_equiv 
 _atom_site_adp_type 
 _atom_site_occupancy 
 _atom_site_symmetry_multiplicity 
 _atom_site_calc_flag 
 _atom_site_refinement_flags 
 _atom_site_disorder_assembly 
 _atom_site_disorder_group 
Cd1 Cd -0.08672(3) 0.20580(3) -0.13651(2) 0.03060(9) Uani 1 1 d . . . 
Cl2 Cl 0.19037(11) -0.03742(10) -0.11094(8) 0.03792(18) Uani 1 1 d . . . 
Cl1 Cl -0.27909(11) 0.19241(11) -0.26581(8) 0.04096(19) Uani 1 1 d . . . 
C11 C -0.3531(5) 0.6238(5) 0.0516(4) 0.0420(8) Uani 1 1 d . . . 
H11A H -0.4419 0.6374 0.1207 0.050 Uiso 1 1 calc R . . 
C9 C -0.1397(5) 0.7277(4) -0.1241(3) 0.0364(7) Uani 1 1 d . . . 
H9A H -0.0820 0.8117 -0.1744 0.044 Uiso 1 1 calc R . . 
C12 C -0.2990(4) 0.4739(4) 0.0226(3) 0.0359(7) Uani 1 1 d . . . 
H12A H -0.3520 0.3868 0.0741 0.043 Uiso 1 1 calc R . . 
C3 C 0.4927(5) 0.2296(5) -0.6292(3) 0.0412(8) Uani 1 1 d . . . 
H3A H 0.5998 0.2381 -0.6812 0.049 Uiso 1 1 calc R . . 
C7 C 0.0422(4) 0.5392(4) -0.2552(3) 0.0287(6) Uani 1 1 d . . . 
C8 C -0.0939(4) 0.5748(4) -0.1483(3) 0.0272(6) Uani 1 1 d . . . 
C4 C 0.4285(4) 0.3203(4) -0.5472(3) 0.0267(6) Uani 1 1 d . . . 
H4A H 0.4880 0.3905 -0.5416 0.032 Uiso 1 1 calc R . . 
C1 C 0.2530(5) 0.1082(5) -0.5629(4) 0.0421(8) Uani 1 1 d . . . 
H1A H 0.1955 0.0361 -0.5682 0.051 Uiso 1 1 calc R . . 
C10 C -0.2737(5) 0.7526(5) -0.0233(4) 0.0433(8) Uani 1 1 d . . . 
H10A H -0.3095 0.8552 -0.0063 0.052 Uiso 1 1 calc R . . 
C6 C 0.2007(4) 0.4136(4) -0.3900(3) 0.0317(6) Uani 1 1 d . . . 
C5 C 0.2735(4) 0.3054(4) -0.4729(3) 0.0316(6) Uani 1 1 d . . . 
C2 C 0.4096(5) 0.1245(5) -0.6413(3) 0.0419(8) Uani 1 1 d . . . 
H2A H 0.4583 0.0657 -0.7013 0.050 Uiso 1 1 calc R . . 
N5 N -0.1732(3) 0.4491(3) -0.0767(2) 0.0293(5) Uani 1 1 d . . . 
N4 N 0.1497(4) 0.6353(4) -0.3231(3) 0.0432(7) Uani 1 1 d . . . 
N3 N 0.2498(4) 0.5525(4) -0.4084(3) 0.0440(7) Uani 1 1 d . . . 
H3B H 0.3338 0.5851 -0.4666 0.053 Uiso 1 1 calc R . . 
N2 N 0.0669(3) 0.4012(3) -0.2910(2) 0.0286(5) Uani 1 1 d . . . 
N1 N 0.1813(4) 0.1994(5) -0.4760(3) 0.0500(8) Uani 1 1 d . . . 
  
loop_ 
 _atom_site_aniso_label 
 _atom_site_aniso_U_11 
 _atom_site_aniso_U_22 
 _atom_site_aniso_U_33 
 _atom_site_aniso_U_23 
 _atom_site_aniso_U_13 
 _atom_site_aniso_U_12 
Cd1 0.03785(14) 0.02529(13) 0.02991(13) -0.01070(9) -0.00088(9) -0.01070(9) 
Cl2 0.0408(4) 0.0302(4) 0.0325(4) -0.0091(3) 0.0062(3) -0.0061(3) 
Cl1 0.0462(4) 0.0449(5) 0.0393(4) -0.0190(4) -0.0071(3) -0.0144(4) 
C11 0.0381(17) 0.049(2) 0.0410(18) -0.0264(16) -0.0001(14) -0.0046(15) 
C9 0.0430(17) 0.0293(16) 0.0429(18) -0.0172(14) -0.0075(14) -0.0096(13) 
C12 0.0348(16) 0.0396(18) 0.0344(16) -0.0161(13) 0.0016(12) -0.0113(13) 
C3 0.0403(18) 0.046(2) 0.0319(16) -0.0137(14) 0.0059(13) -0.0107(15) 
C7 0.0329(14) 0.0227(14) 0.0302(14) -0.0081(11) -0.0023(11) -0.0091(11) 
C8 0.0296(14) 0.0261(14) 0.0280(13) -0.0106(11) -0.0069(11) -0.0058(11) 
C4 0.0300(14) 0.0267(14) 0.0230(13) -0.0098(11) 0.0057(10) -0.0122(11) 
C1 0.0419(18) 0.051(2) 0.0414(18) -0.0233(16) -0.0053(14) -0.0127(16) 
C10 0.0489(19) 0.0354(18) 0.051(2) -0.0272(16) -0.0100(16) -0.0007(15) 
C6 0.0335(15) 0.0290(15) 0.0294(14) -0.0091(12) 0.0019(11) -0.0094(12) 
C5 0.0334(15) 0.0299(15) 0.0278(14) -0.0087(12) -0.0011(11) -0.0070(12) 
C2 0.049(2) 0.047(2) 0.0321(16) -0.0210(15) -0.0055(14) -0.0057(16) 
N5 0.0338(13) 0.0268(12) 0.0285(12) -0.0122(10) -0.0025(10) -0.0068(10) 
N4 0.0473(17) 0.0359(16) 0.0497(17) -0.0210(13) 0.0120(13) -0.0203(13) 
N3 0.0470(16) 0.0362(16) 0.0474(17) -0.0179(13) 0.0176(13) -0.0218(13) 
N2 0.0327(12) 0.0254(12) 0.0271(12) -0.0091(10) -0.0004(10) -0.0088(10) 
N1 0.0506(18) 0.055(2) 0.0484(18) -0.0219(15) -0.0071(14) -0.0128(15) 
  
_geom_special_details 
; 
 All esds (except the esd in the dihedral angle between two l.s. planes) 
 are estimated using the full covariance matrix.  The cell esds are taken 
 into account individually in the estimation of esds in distances, angles 
 and torsion angles; correlations between esds in cell parameters are only 
 used when they are defined by crystal symmetry.  An approximate (isotropic) 
 treatment of cell esds is used for estimating esds involving l.s. planes. 
; 
  
loop_ 
 _geom_bond_atom_site_label_1 
 _geom_bond_atom_site_label_2 
 _geom_bond_distance 
 _geom_bond_site_symmetry_2 
 _geom_bond_publ_flag 
Cd1 N5 2.321(2) . ? 
Cd1 N2 2.361(2) . ? 
Cd1 Cl1 2.4271(8) . ? 
Cd1 Cl2 2.5401(9) . ? 
Cd1 Cl2 2.6446(8) 2 ? 
Cl2 Cd1 2.6446(8) 2 ? 
C11 C10 1.377(6) . ? 
C11 C12 1.383(5) . ? 
C11 H11A 0.9300 . ? 
C9 C8 1.386(4) . ? 
C9 C10 1.386(5) . ? 
C9 H9A 0.9300 . ? 
C12 N5 1.338(4) . ? 
C12 H12A 0.9300 . ? 
C3 C4 1.335(4) . ? 
C3 C2 1.375(6) . ? 
C3 H3A 0.9300 . ? 
C7 N4 1.316(4) . ? 
C7 N2 1.358(4) . ? 
C7 C8 1.464(4) . ? 
C8 N5 1.350(4) . ? 
C4 C5 1.346(4) . ? 
C4 H4A 0.9300 . ? 
C1 C2 1.375(5) . ? 
C1 N1 1.385(5) . ? 
C1 H1A 0.9300 . ? 
C10 H10A 0.9300 . ? 
C6 N3 1.338(4) . ? 
C6 N2 1.343(4) . ? 
C6 C5 1.459(4) . ? 
C5 N1 1.394(5) . ? 
C2 H2A 0.9300 . ? 
N4 N3 1.359(4) . ? 
N3 H3B 0.8600 . ? 
  
loop_ 
 _geom_angle_atom_site_label_1 
 _geom_angle_atom_site_label_2 
 _geom_angle_atom_site_label_3 
 _geom_angle 
 _geom_angle_site_symmetry_1 
 _geom_angle_site_symmetry_3 
 _geom_angle_publ_flag 
N5 Cd1 N2 72.07(9) . . ? 
N5 Cd1 Cl1 115.01(7) . . ? 
N2 Cd1 Cl1 103.27(7) . . ? 
N5 Cd1 Cl2 131.38(7) . . ? 
N2 Cd1 Cl2 91.96(6) . . ? 
Cl1 Cd1 Cl2 113.28(3) . . ? 
N5 Cd1 Cl2 87.77(7) . 2 ? 
N2 Cd1 Cl2 150.14(6) . 2 ? 
Cl1 Cd1 Cl2 105.20(3) . 2 ? 
Cl2 Cd1 Cl2 85.00(3) . 2 ? 
Cd1 Cl2 Cd1 95.00(3) . 2 ? 
C10 C11 C12 119.0(3) . . ? 
C10 C11 H11A 120.5 . . ? 
C12 C11 H11A 120.5 . . ? 
C8 C9 C10 118.4(3) . . ? 
C8 C9 H9A 120.8 . . ? 
C10 C9 H9A 120.8 . . ? 
N5 C12 C11 122.7(3) . . ? 
N5 C12 H12A 118.7 . . ? 
C11 C12 H12A 118.7 . . ? 
C4 C3 C2 123.7(3) . . ? 
C4 C3 H3A 118.1 . . ? 
C2 C3 H3A 118.1 . . ? 
N4 C7 N2 114.8(3) . . ? 
N4 C7 C8 123.6(3) . . ? 
N2 C7 C8 121.6(3) . . ? 
N5 C8 C9 122.6(3) . . ? 
N5 C8 C7 115.1(3) . . ? 
C9 C8 C7 122.3(3) . . ? 
C3 C4 C5 116.9(3) . . ? 
C3 C4 H4A 121.5 . . ? 
C5 C4 H4A 121.5 . . ? 
C2 C1 N1 119.7(3) . . ? 
C2 C1 H1A 120.1 . . ? 
N1 C1 H1A 120.1 . . ? 
C11 C10 C9 119.3(3) . . ? 
C11 C10 H10A 120.4 . . ? 
C9 C10 H10A 120.4 . . ? 
N3 C6 N2 108.3(3) . . ? 
N3 C6 C5 124.3(3) . . ? 
N2 C6 C5 127.2(3) . . ? 
C4 C5 N1 123.6(3) . . ? 
C4 C5 C6 115.9(3) . . ? 
N1 C5 C6 120.4(3) . . ? 
C3 C2 C1 118.7(3) . . ? 
C3 C2 H2A 120.7 . . ? 
C1 C2 H2A 120.7 . . ? 
C12 N5 C8 118.0(3) . . ? 
C12 N5 Cd1 124.1(2) . . ? 
C8 N5 Cd1 117.81(19) . . ? 
C7 N4 N3 102.1(3) . . ? 
C6 N3 N4 111.2(3) . . ? 
C6 N3 H3B 124.4 . . ? 
N4 N3 H3B 124.4 . . ? 
C7 N2 C6 103.5(2) . . ? 
C7 N2 Cd1 112.37(18) . . ? 
C6 N2 Cd1 142.2(2) . . ? 
C1 N1 C5 117.4(3) . . ? 
  
loop_ 
 _geom_torsion_atom_site_label_1 
 _geom_torsion_atom_site_label_2 
 _geom_torsion_atom_site_label_3 
 _geom_torsion_atom_site_label_4 
 _geom_torsion 
 _geom_torsion_site_symmetry_1 
 _geom_torsion_site_symmetry_2 
 _geom_torsion_site_symmetry_3 
 _geom_torsion_site_symmetry_4 
 _geom_torsion_publ_flag 
N5 Cd1 Cl2 Cd1 82.59(9) . . . 2 ? 
N2 Cd1 Cl2 Cd1 150.23(6) . . . 2 ? 
Cl1 Cd1 Cl2 Cd1 -104.42(3) . . . 2 ? 
Cl2 Cd1 Cl2 Cd1 0.0 2 . . 2 ? 
C10 C11 C12 N5 -0.8(5) . . . . ? 
C10 C9 C8 N5 -0.8(5) . . . . ? 
C10 C9 C8 C7 178.1(3) . . . . ? 
N4 C7 C8 N5 -170.1(3) . . . . ? 
N2 C7 C8 N5 9.5(4) . . . . ? 
N4 C7 C8 C9 10.9(5) . . . . ? 
N2 C7 C8 C9 -169.5(3) . . . . ? 
C2 C3 C4 C5 0.2(5) . . . . ? 
C12 C11 C10 C9 -1.1(5) . . . . ? 
C8 C9 C10 C11 1.8(5) . . . . ? 
C3 C4 C5 N1 1.3(5) . . . . ? 
C3 C4 C5 C6 -176.3(3) . . . . ? 
N3 C6 C5 C4 18.6(5) . . . . ? 
N2 C6 C5 C4 -167.0(3) . . . . ? 
N3 C6 C5 N1 -159.1(3) . . . . ? 
N2 C6 C5 N1 15.3(5) . . . . ? 
C4 C3 C2 C1 -1.4(6) . . . . ? 
N1 C1 C2 C3 1.2(5) . . . . ? 
C11 C12 N5 C8 1.8(5) . . . . ? 
C11 C12 N5 Cd1 -176.8(2) . . . . ? 
C9 C8 N5 C12 -1.0(4) . . . . ? 
C7 C8 N5 C12 180.0(3) . . . . ? 
C9 C8 N5 Cd1 177.7(2) . . . . ? 
C7 C8 N5 Cd1 -1.3(3) . . . . ? 
N2 Cd1 N5 C12 175.2(3) . . . . ? 
Cl1 Cd1 N5 C12 78.6(3) . . . . ? 
Cl2 Cd1 N5 C12 -108.5(2) . . . . ? 
Cl2 Cd1 N5 C12 -27.2(2) 2 . . . ? 
N2 Cd1 N5 C8 -3.4(2) . . . . ? 
Cl1 Cd1 N5 C8 -100.1(2) . . . . ? 
Cl2 Cd1 N5 C8 72.8(2) . . . . ? 
Cl2 Cd1 N5 C8 154.2(2) 2 . . . ? 
N2 C7 N4 N3 0.1(4) . . . . ? 
C8 C7 N4 N3 179.8(3) . . . . ? 
N2 C6 N3 N4 -0.4(4) . . . . ? 
C5 C6 N3 N4 175.0(3) . . . . ? 
C7 N4 N3 C6 0.1(4) . . . . ? 
N4 C7 N2 C6 -0.3(4) . . . . ? 
C8 C7 N2 C6 -180.0(3) . . . . ? 
N4 C7 N2 Cd1 167.5(2) . . . . ? 
C8 C7 N2 Cd1 -12.2(3) . . . . ? 
N3 C6 N2 C7 0.4(3) . . . . ? 
C5 C6 N2 C7 -174.8(3) . . . . ? 
N3 C6 N2 Cd1 -161.0(3) . . . . ? 
C5 C6 N2 Cd1 23.8(5) . . . . ? 
N5 Cd1 N2 C7 7.86(19) . . . . ? 
Cl1 Cd1 N2 C7 120.21(19) . . . . ? 
Cl2 Cd1 N2 C7 -125.3(2) . . . . ? 
Cl2 Cd1 N2 C7 -41.9(3) 2 . . . ? 
N5 Cd1 N2 C6 168.3(4) . . . . ? 
Cl1 Cd1 N2 C6 -79.4(3) . . . . ? 
Cl2 Cd1 N2 C6 35.1(3) . . . . ? 
Cl2 Cd1 N2 C6 118.5(3) 2 . . . ? 
C2 C1 N1 C5 0.2(5) . . . . ? 
C4 C5 N1 C1 -1.5(5) . . . . ? 
C6 C5 N1 C1 176.1(3) . . . . ? 
  
loop_ 
 _geom_hbond_atom_site_label_D 
 _geom_hbond_atom_site_label_H 
 _geom_hbond_atom_site_label_A 
 _geom_hbond_distance_DH 
 _geom_hbond_distance_HA 
 _geom_hbond_distance_DA 
 _geom_hbond_angle_DHA 
 _geom_hbond_site_symmetry_A 
N3 H3B Cl1  0.86 2.91 3.440(3) 122.1 2_564 
C4 H4A N3  0.93 2.25 3.049(4) 143.6 2_664 
C11 H11A Cl1  0.93 2.80 3.674(4) 158.0 2_465 
C12 H12A Cl2  0.93 2.83 3.438(4) 124.1 2 
  
_diffrn_measured_fraction_theta_max    0.985 
_diffrn_reflns_theta_full              27.48 
_diffrn_measured_fraction_theta_full   0.985 
_refine_diff_density_max    0.831 
_refine_diff_density_min   -0.759 
_refine_diff_density_rms    0.091 
  
